# Supplementary material
Source: PubMed Central journal article supplement (PMC1456902)
Supplement: 7400625-s1.pdf [file 7400625-s1.pdf]

**Tudor domain binding to arrayed peptides confirms the profiles seen on the CADOR chip**

To independently validate the domain-peptide interactions that we detected with the CADOR chip, we used the more traditional approach of surface plasmon resonance (SPR). In this case, instead of probing an array of protein domains with a single labeled peptide, we probed an array of differentially modified peptides with a single domain. A peptide array was generated with the nine modified peptides used to probe the domain array. Unmethylated control peptides were also included. We first demonstrated that the chromo domain of HP1 $\beta$  binds specifically to the methylated H3K9 motif (**Fig S1**). We then probed the Flex Chip with the tudor domains (JMJD2A, 53BP1 and C20orf104) that we had detected as methyl-dependent histone tail binders. This approach allows us to judge the relative binding affinity of a tudor domain with the arrayed peptide set. The JMJD2A binds most strongly to H4K20 in the di- and trimethylated states. It also binds H3K4me<sub>2</sub>, H3K4me<sub>3</sub> and H3K9me<sub>3</sub>. Using this approach, the tudor domains of 53BP1 bind strongly to H4K20 in the mono- and di-methylated states. Weak binding of 53BP1 tudors is also seen with H3K4me<sub>2</sub> and H3K9me<sub>2</sub>. The C20orf104 tudor again displays a binding profile similar to that of the 53BP1 tudors, with selective binding to di-methylated peptides (H3K4me<sub>2</sub>, H3K9me<sub>2</sub> and H4K20me<sub>2</sub>). Thus, using this approach (**Fig S1**), we confirmed the specific tudor domain interactions first detected on the CADOR chip (**Fig 2**) and observed by the pull-down experiments (**Fig 3**).

**METHODS - Surface Plasmon Resonance**

Peptide-protein interactions were evaluated using HTS Biosystems' (East Hartford, CT) FlexChip Kinetic Analysis System that utilizes grating-coupled SPR microarray technology. Biotinylated peptides derived from histone tails were diluted to 125  $\mu$ M and 25  $\mu$ M in 1X PBS + 50  $\mu$ g/ml BSA. These were spotted on a neutravidin coated affinity chip in triplicate spots using a Cartesian pin contact arrayer, then sealed with a fluid tight flowcell. The array was blocked with 1X PBS, 0.5% Tween, 1:10 Superblock (Pierce) and 1 mM d-biotin (Sigma) and then sequentially followed with (1) running buffer (1X PBS + 0.5% Tween) for 30 minutes of equilibration, (2) GST fusion protein resuspended in running buffer at a set concentration for 60 minutes of sample association, and (3) running buffer alone for 30 minutes of sample dissociation. Specific binding to each spot results in a change in mass locally. This was recorded simultaneously for all spots in real time by measuring SPR change using a CCD camera during the entire run. Resonance changes between the onset and the end of the sample association phase were calculated as end-point values for each spot using the FlexChip Data Analysis software.

**Supplementary Figure 1.** A surface plasmon resonance based approach detects methyl-dependent interactions of tudor domains with arrayed peptides from histone tails. The proteins were diluted to the following concentrations: HP1beta to 1  $\mu$ M, JMJD2A to 5  $\mu$ M, 53BP1 to 10  $\mu$ M and C20orf104 to 25  $\mu$ M. A control sample of GST fusion protein alone was also compared at 25  $\mu$ M. The protein samples were allowed to flow over a chip spotted with biotinylated peptides at two concentrations (25  $\mu$ M and 125  $\mu$ M). The background spot was comprised of the peptide diluent only. Binding was quantitated by measuring the change in surface plasmon resonance units over each spot following 60 minutes of sample flow over the chip. Data from 3 replicate spots was averaged to show the resonance change units (RCU) measurement for each peptide as a histogram and the corresponding standard deviations depicted as error bars.

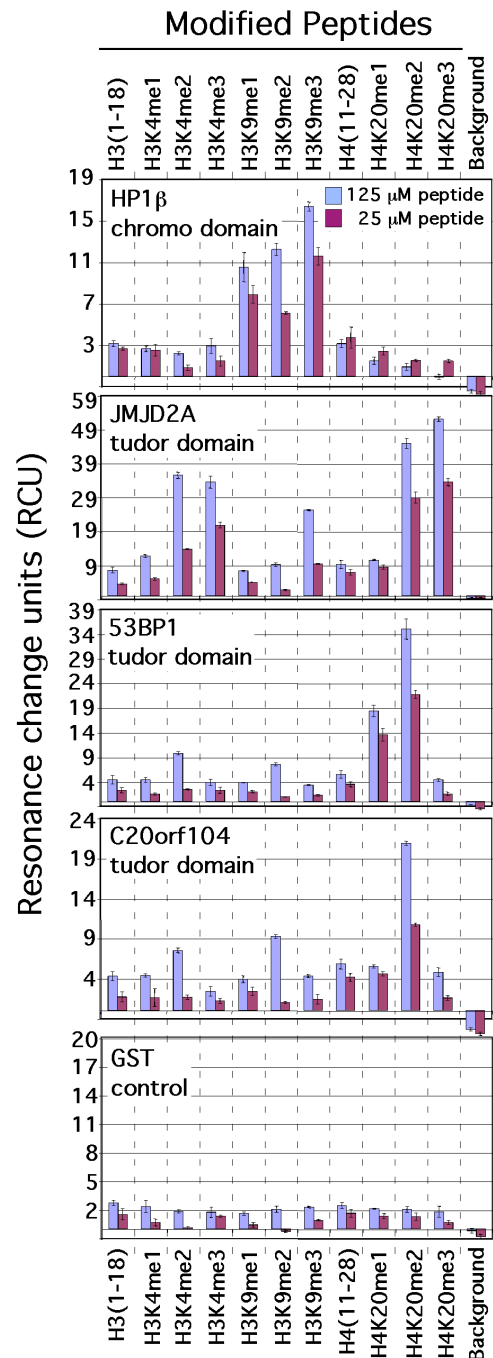

**Supplementary Figure 2.** Western analysis was performed with methyl-specific antibodies to confirm the presence of different methyl marks on the core histones. Western analysis was performed with the following specific antibodies; H3 (Upstate Cat# 06-755), H4 (Upstate Cat# 07-108), H4K20me3 (Upstate Cat# 07-463) and H3K4me3 (Upstate Cat# 07-473).

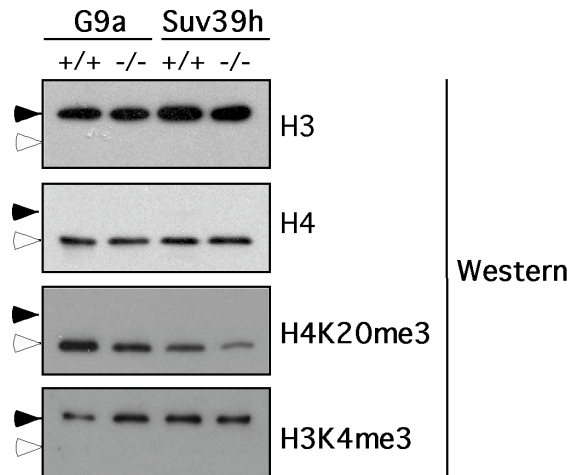

**Table S1. Details on subcloned domains – accession numbers and regions cloned.**

| <b>Protein</b>    | <b>Region</b>         | <b>Accession</b> | <b>Protein</b> | <b>Region</b>                 | <b>Accession</b> |
|-------------------|-----------------------|------------------|----------------|-------------------------------|------------------|
| <b>TUDOR</b>      |                       |                  | <b>PhD+</b>    |                               |                  |
| A1                | ESET (218-436)        | NP_036564        | G1             | JMJD2A PhD+ 2Tudor (682-1047) | NP_055478        |
| A2                | CG1-72 (54-160)       | NP_057102        | G2             | JMJC PhD (682-865)            | NP_055478        |
| A3                | FX (56-152)           | AAH67272         | G3             | M96 Tudor+PhD (1+298)         | AAH10013         |
| A4                | C20orf140 (85-129)    | NP_057520        | G4             | MYST4 PhD+PhD (165-359)       | AAH48199         |
| A5                | JMJD2A/2 (944-1047)   | NP_055478        | G5             | NSD1 PhD+PWWP (1237-1645)     | Q96L73           |
| A6                | Pombe 1 (25-162)      | CAA22823         | G6             | WHSC1 PhD+PWWP (780-1016)     | NP_579877        |
| A7                | Pombe 2 (620-789)     | CAB39904         | G7             | PRKCB1 PhD+BRD+PWWP (75-393)  | Q9UIU4           |
| A8                | Colon 1 (65-159)      | AAC18034         | G8             | BS69 PhD+ BRD (1-392)         | AAH12586         |
| A9                | Colon 2 (275-364)     | AAC18034         | <b>CHROMO</b>  |                               |                  |
| A10               | JMJD2A/1 (856-966)    | NP_055478        | H1             | TIP60 (1-77)                  | AAB18236         |
| A11               | Tudor 9 (628-757)     | NP_694591        | H2             | CHD2 (247-358)                | AAB87382         |
| A12               | LaminB (1-78)         | NP_919424        | H3             | CHD4 (503-591)                | AAH38596         |
| B1                | TDRD1/1 (75-222)      | NP_112568        | H5             | SMARCC2 (179-256)             | AAH26222         |
| B2                | TDRD1/2 (695-846)     | NP_112568        | H6             | MRG15 (1-80)                  | AAD29872         |
| B3                | TDRD2 (292-433)       | NP_006853.1      | H7             | RBBP1 (41-91)                 | AAD41239         |
| B4                | TDRD3 (495-651)       | Q9H7E2           | H8             | PC2 (1-75)                    | AAH80718         |
| B5                | TDRD4-1 (1-104)       | Q9NUY9           | H9             | PC3 (1-71)                    | AAG09180         |
| B6                | TDRD4-2 (220-358)     | Q9NUY9           | H10            | CHD5 (260-430)                | AAK56405         |
| B7                | TDRD4-3 (405-571)     | Q9NUY9           | I1             | MI-2 (480-539)                | CAA60384         |
| B8                | TDRD5 (103-253)       | Q8NAT2           | I2             | HP1 alpha (1-120)             | P45973           |
| B9                | PCTAIRE-1 (449-591)   | NP_055105        | I3             | HP1 gamma (11-129)            | NP_057671        |
| B10               | PCTAIRE-2 (639-787)   | NP_055105        | I4             | Msl3-like (1-103)             | AAD38499         |
| B11               | PCTAIRE-3 (896-1038)  | NP_055105        | I5             | SUV39H1 (1-114)               | AAB92224         |
| B12               | JMJD2A/1-2 (856-1047) | NP_055478        | I6             | CBX1 (1-52)                   | AAD21972         |
| C1                | EBNA-2Co-A (635-788)  | NP_055205        | I7             | HP1 beta (1-185)              | P23197           |
| C2                | Ret-bp1 (36-138)      | AAB28543         | I8             | CDY1 (1-71)                   | AAD22735         |
| C3                | M96 (25-115)          | AAH10013         |                | TUDOR                         |                  |
| C4                | STK31 (57-153)        | Q9BXU1           | J1             | L(3)MBT (430-539)             | NP_056293        |
| C5                | 53BP1/1-2 (1459-1634) | NP_005648        | J2             | SCML1 (41-477)                | NP_057413        |
| C6                | 53BP1/1 (1459-1587)   | NP_005648        | J3             | SCML2 (57-261)                | AAH64617         |
| C7                | 53BP1/2 (1518-1634)   | NP_005648        | J4             | SCMH1 (1-193)                 | AAH21252         |
| C8                | Anchor (690-849)      | NP_003479        | J5             | LML2 (201-620)                | Q969R5           |
| C9                | 2B (895-1060)         | NP_055830        | J6             | KIAA1617 (267-496)            | XP_166140        |
| C10               | 2C (849-1017)         | NP_055876        | J7             | C20orf140-MBT (1-83)          | NP_057520        |
| C11               | RBP1 like-2 (34-130)  | NP_112739        | J8             | CG1-72-MBT (1-74)             | NP_057102        |
| C12               | SMN (80-172)          | NP_075012        | J9             | C20orf140-MBT+TDR (1-194)     | NP_057520        |
| <b>CW</b>         |                       |                  | <b>BROMO</b>   |                               |                  |
| D1                | CW1 (451-545)         | BAA74875         | K1             | GCN5 (1364-1624)              | Q92830           |
| D2                | CW3 (117-194)         | AAH02725         | K2             | TAF1- D1 (1364-1499)          | NP_620278        |
| D3                | CW4 (346-438)         | CAD23056         | K3             | TAF1- D2 (1486-1624)          | NP_620278        |
| D4                | CW5 (405-472)         | BAA09485         | K4             | P/CAF (709-832)               | S71788           |
| D5                | CW6 (14-88)           | XP_087384        | K5             | SP140 (739-866)               | NP_009168        |
| D9                | Tudor Rhp9 (341-510)  | CAB46775         | K7             | SNF2 beta (1449-1565)         | S45252           |
| <b>PWWP</b>       |                       |                  | K8             | SMAP (588-721)                | NP_899203        |
| E1                | BRPF1 (1073-1220)     | AAH53851         | K9             | BAF180 1-2 (30-301)           | NP_060635        |
| E2                | BS69 (151-343)        | AAH12586         | I10            | BAF180 3 (335-481)            | NP_060635        |
| E4                | DNMT3B (107-341)      | Q9UBC3           | K11            | BAF180 3-4 (335-481)          | NP_060635        |
| E5                | HDGF (1-113)          | P51858           | K12            | BAF180 5-6 (660-862)          | NP_060635        |
| E6                | HRP-3 (1-114)         | BAA90477         | L1             | TIF1 alpha (847-973)          | AAD17258         |
| E7                | MSH6 (72-216)         | P52701           | L2             | KAP-1 (685-835)               | AAB37341         |
| E8                | NSD1 (1736-1871)      | Q96L73           | L3             | P300 (1075-1203)              | NP_004371        |
| E9                | WHSC1-1 (205-349)     | NP_579877        | L4             | WDR9 1-2 (1145-1429)          | Q9NSI6           |
| <b>SANT/SWIRM</b> |                       |                  | L5             | WDR9 1 (1145-1277)            | Q9NSI6           |
| F1                | MPP11-like (493-593)  | XP_379909        | L6             | WDR9 2 (1305-1429)            | Q9NSI6           |
| F2                | MTA1 (267-353)        | Q13330           | L7             | BAZ (1327-1483)               | NP_075381        |
| F3                | N-CoR2 (408-680)      | Q9Y618           | L8             | BRDT 1-2 (15-388)             | AAH62700         |
| F4                | N-CoR2-1 (408-489)    | Q9Y618           | L9             | BRDT 1 (15-145)               | AAH62700         |
| F5                | N-CoR2-2 (598-680)    | Q9Y618           | L10            | BRDT 2 (258-388)              | AAH62700         |
| F6                | N-CoR1 (416-695)      | NP_006302        | L11            | BRD4 1 (45-165)               | NP_932762        |
| F7                | RERE (304-400)        | AAH62342         |                |                               |                  |
| F8                | ADA2-SANT (55-144)    | NP_001479        |                |                               |                  |
| F9                | Zuotin Rel. (402-593) | XP_168590        |                |                               |                  |
| F10               | KIAA1915 (248-390)    | BAB67808         |                |                               |                  |
| F11               | KIAA0601 (207-391)    | CAB72299         |                |                               |                  |
| F12               | ADA2-Swirm (337-443)  | NP_001479        |                |                               |                  |
